# Supplementary material
Source: PubMed Central journal article supplement (PMC5370557)
Supplement: NIHMS828538-supplement-216_2016_41_MOESM1_ESM.pdf [file NIHMS828538-supplement-216_2016_41_MOESM1_ESM.pdf]

**Analytical and Bioanalytical Chemistry**

**Electronic Supplementary Material**

**Site-specific analysis of changes in the glycosylation of proteins in liver cirrhosis using data-independent workflow with soft fragmentation**

Miloslav Sanda, Lihua Zhang, Nathan J. Edwards, Radoslav Goldman

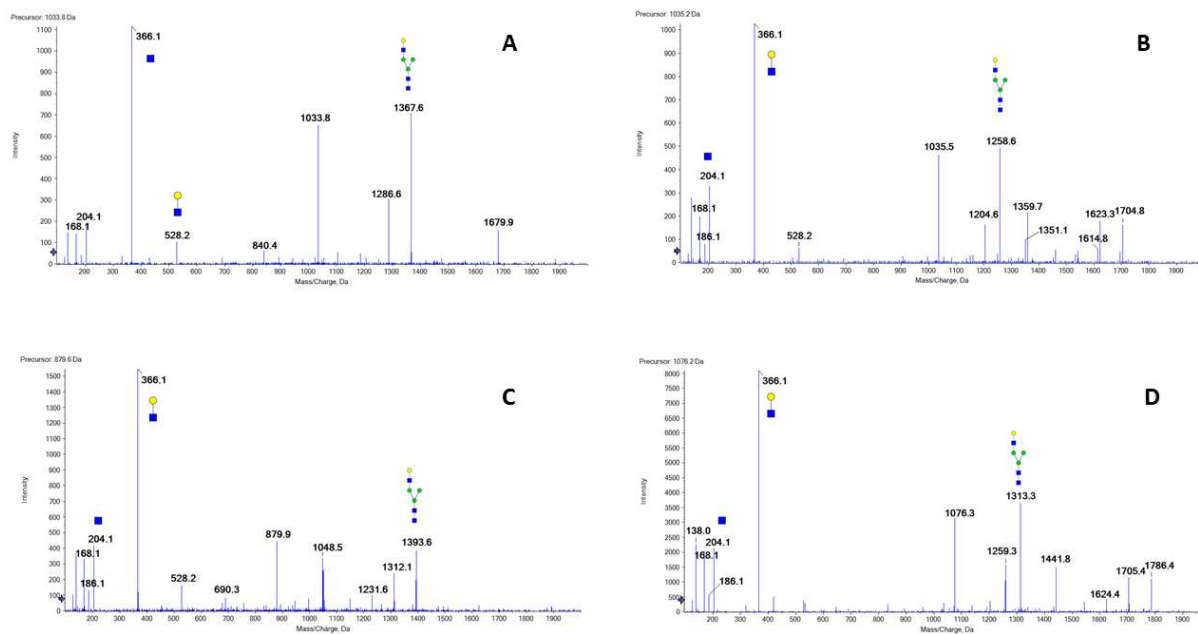

**Fig S1** Soft fragmentation of four glycopeptides (bi-antennary structures) derived from neuraminidase treated tryptic digest of proteins retained on the MARS14 column. The soft fragments used for quantification of each glycopeptide are highlighted by the structural schematics. A. CGLVPVLAENYNK peptide of serotransferrin; B. GTAGNALMDGASQLMGENR peptide of fibrinogen; C. QQHLFGSNVTDCSGNFCLFRSETK peptide of serotransferrin; and D. MVSHHNLTTGATLINEQWLLTTAK peptide of haptoglobin

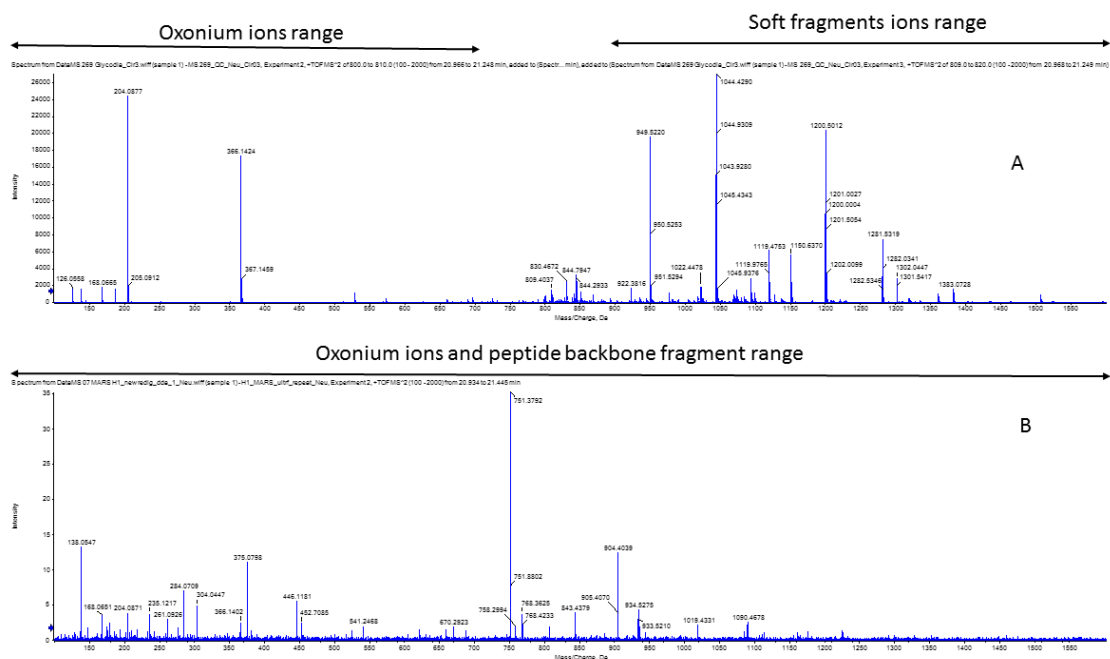

**Fig S2** CID spectra of all precursors 700-1250 m/z in the retention time window of IgG2 N-glycoforms obtained by tryptic digest of the proteins retained on the MARS 14 column. A. Low CID setting selected for fragmentation of the N-glycopeptides; and B. CID settings optimized for fragmentation of the peptides

**Table S1** Identified and quantified glycopeptide structures at each site of N-glycosylation with precursor m/z information, dominant fragment selected for DIA quantification, and ratio of average fucosylation in cirrhosis vs control samples

| Protein/peptide             | GLYCAN FORMULA | PRECURSOR m/z | QUANTIFIED or DETECTED | PRECURSOR CHARGE STATE | SOFT FRAGMENT m/z | Mean CIRR/ Mean CTRL |
|-----------------------------|----------------|---------------|------------------------|------------------------|-------------------|----------------------|
| <b>ALPHA2-MACROGLOBULIN</b> |                |               |                        |                        |                   |                      |
| VSNQTLSLF FTVLQDVPVR        | A2G2           | 947.2         | Q                      | 4                      | 1140.88           | --                   |
|                             | A2G2F1         | 983.71        | Q                      | 4                      | 1189.57           | 0.74                 |
|                             | A3G3           | 1038.48       | Q                      | 4                      | 1262.59           | --                   |
|                             | A3G3F1         | 1074.99       | Q                      | 4                      | 1311.28           | 1.12                 |
|                             | A3G3F2         | 111.51        | Q                      | 4                      | 1311.28           | 1.45                 |
| IITILEEEMNVSVCGLYTYGK       | A2G2           | 1014.45       | Q                      | 4                      | 1230.56           | --                   |
|                             | A2G2F1         | 1050.98       | Q                      | 4                      | 1279.24           | 1.11                 |
| SINTTNVMGTSLTVR             | A2G2           | 1072.81       | Q                      | 3                      | 1426.14           | --                   |
|                             | A2G2F1         | 1121.51       | Q                      | 3                      | 1499.17           | 0.73                 |
|                             | A3G3           | 1194.51       | D                      | 3                      | 1608.71           | --                   |
| GCVLLSYLNETVTVSASLESVR      | A2G2           | 1005.57       | Q                      | 4                      | 1218.9            | --                   |
|                             | A2G2F1         | 1042.1        | Q                      | 4                      | 1267.58           | 0.79                 |
|                             | A3G3           | 1096.85       | D                      | 4                      | 1340.61           | --                   |
| IYVLDYLNQQLTPEIK            | A2G2           | 951.44        | Q                      | 4                      | 1146.54           | --                   |
|                             | A2G2F1         | 987.96        | D                      | 4                      | 1146.54           | --                   |
|                             | A3G3           | 1042.71       | Q                      | 4                      | 1268.25           | --                   |
|                             | A3G3F1         | 1079.24       | Q                      | 4                      | 1268.25           | 1.23                 |
| <b>HAPTOGLOBIN</b>          |                |               |                        |                        |                   |                      |
| MVSHHNLTTGATLINEQWLLTTAK    | A2G2           | 1076.25       | Q                      | 4                      | 1312.95           | --                   |
|                             | A2G2F1         | 1112.77       | Q                      | 4                      | 1361.64           | 1.26                 |
|                             | A3G3           | 1167.52       | Q                      | 4                      | 1434.67           | --                   |
|                             | A3G3F1         | 1204.05       | Q                      | 4                      | 1483.35           | 2.53                 |

|                            |        |         |   |   |         |      |
|----------------------------|--------|---------|---|---|---------|------|
|                            | A3G3F2 | 1240.57 | Q | 4 | 1483.35 | 3.11 |
|                            | A4G4   | 1007.24 | Q | 5 | 1167.53 | --   |
|                            | A4G4F1 | 1065.48 | D | 5 | 1204.05 | --   |
|                            | A4G4F2 | 1094.9  | D | 5 | 1204.05 | --   |
| NLFLNHSENATAK              | A2G2   | 1176.73 | Q | 4 | 1446.93 | --   |
|                            | A2G2F1 | 1213.26 | Q | 4 | 1495.61 | 2.22 |
|                            | A2G2F2 | 1249.78 | D | 4 | 1544.3  | --   |
| VVLHPNYSQVDIGLIK           | A2G2   | 855.15  | Q | 4 | 1018.16 | --   |
|                            | A2G2F1 | 891.68  | Q | 4 | 1066.84 | 0.95 |
|                            | A3G3   | 946.43  | Q | 4 | 1139.87 | --   |
|                            | A3G3F1 | 982.95  | Q | 4 | 1188.55 | 2.41 |
|                            | A3G3F2 | 1019.48 | D | 4 | 1188.55 | --   |
|                            | AG44   | 1074.23 | Q | 4 | 1261.58 | --   |
|                            | A4G4F1 | 1110.75 | Q | 4 | 1310.27 | 8.8  |
|                            | A4G4F2 | 1147.28 | D | 4 | 1310.27 | --   |
| SEROTRANSFERRIN            |        |         |   |   |         | --   |
| QQQHILFGSNVTDCSGNFCLFRSETK | A2G2   | 1035.18 | Q | 4 | 1258.2  | --   |
|                            | A2G2F1 | 1071.71 | Q | 4 | 1306.88 | 0.97 |
|                            | A3G3   | 1126.46 | Q | 4 | 1379.91 | --   |
|                            | A3G3F1 | 1162.98 | Q | 4 | 1428.59 | 2.33 |
|                            | A3G3F2 | 1199.51 | Q | 4 | 1428.59 | 4.14 |
|                            | A3G3F3 | 1236.03 | D | 4 | 1477.28 | --   |
|                            | A4G4   | 974.39  | D | 5 | 1126.46 | --   |
| CGLVPVLAENYNK              | A2G2   | 1033.78 | Q | 3 | 1367.6  | --   |
|                            | A2G2F1 | 1082.48 | Q | 3 | 1440.63 | 2.26 |
|                            | A3G3   | 1155.48 | Q | 3 | 1550.17 | --   |
|                            | A3G3F1 | 1204.18 | Q | 3 | 1623.2  | 8.44 |
|                            | A3G3F2 | 939.91  | D | 4 | 1131.15 | --   |
|                            | AG44   | 958.14  | D | 4 | 1155.49 | --   |
|                            | A4G4F1 | 1030.94 | D | 4 | 1204.18 | --   |

|                                  |        |         |   |   |         |      |
|----------------------------------|--------|---------|---|---|---------|------|
| <b>ANTITRYPSIN</b>               |        |         |   |   |         |      |
| QLAHQSNSTNIFFSPVSIATAFAMLSLGTK   | A2G2   | 961.65  | Q | 5 | 1110.53 | --   |
|                                  | A2G2F1 | 1020.09 | D | 5 | 1147.04 | --   |
|                                  | A3G3   | 1034.67 | Q | 5 | 1201.81 | --   |
| ADTHDEILEGLNFNLTEIPEAQIHEGFQELLR | A2G2   | 1063.69 | Q | 5 | 1238.07 | --   |
|                                  | A2G2F1 | 1092.91 | Q | 5 | 1274.59 | 1.43 |
|                                  | A3G3   | 1136.71 | Q | 5 | 1329.36 | --   |
|                                  | A3G3F1 | 1165.93 | Q | 5 | 1365.87 | 1.72 |
|                                  | A3G3F2 | 1195.15 | Q | 5 | 1365.87 | 2.84 |
|                                  | A3G3F3 | 1224.37 | D | 5 | 1402.39 | --   |
|                                  | A4G4   | 1238.95 | Q | 5 | 1420.64 | --   |
|                                  | A4G4F1 | 1056.81 | Q | 6 | 1065.92 | 1.11 |
|                                  | A4G4F2 | 1081.32 | D | 6 | 1165.92 | --   |
|                                  | A4G4F3 | 1105.67 | D | 6 | 1195.14 | --   |
| YLGNATAIFFLPDEGK                 | A2G2   | 1126.83 | Q | 3 | 1507.18 | --   |
|                                  | A2G2F1 | 1175.53 | Q | 3 | 1580.2  | 1.94 |
|                                  | A3G3   | 1248.53 | Q | 3 | 1689.74 | --   |
|                                  | A3G3F1 | 973.17  | D | 4 | 1175.56 | --   |
|                                  | A3G3F2 | 1009.05 | D | 4 | 1224.23 |      |
| <b>FIBRINOGEN</b>                |        |         |   |   |         |      |
| DLQSLEDILHQVENK                  | A2G2   | 851.63  | Q | 4 | 1013.46 | --   |
|                                  | A2G2F1 | 888.15  | Q | 4 | 1062.14 | 2.81 |
|                                  | A3G3   | 942.9   | D | 4 | 1135.17 | --   |
| GTAGNALMDGASQLMGENR              | A2G2   | 879.62  | Q | 4 | 1050.77 | --   |
|                                  | A2G2F1 | 916.14  | Q | 4 | 1099.46 | 7.28 |
|                                  | A3G3   | 970.89  | D | 4 | 1172.49 | --   |
| <b>Ig A</b>                      |        |         |   |   |         |      |
| PALEDLLLSEANLTCTLTGLR            | A2G2   | 995.71  | Q | 4 | 1205.57 | --   |
|                                  | A2G2F1 | 1032.24 | Q | 4 | 1254.25 | 0.82 |
|                                  | A3G3   | 1086.99 | Q | 4 | 1327.28 | --   |

|                                |         |         |   |   |         |      |
|--------------------------------|---------|---------|---|---|---------|------|
|                                | A3G3F1  | 1123.51 | Q | 4 | 1375.96 | --   |
|                                | A2G1    | 955.19  | Q | 4 | 1151.55 | --   |
|                                | A2G1F1  | 991.72  | Q | 4 | 1200.24 | 0.64 |
|                                | AB1G1   | 1005.97 | Q | 4 | 1219.24 | --   |
|                                | AB1G1F1 | 1042.49 | Q | 4 | 1267.93 | 0.87 |
|                                | A2G2B   | 1046.49 | Q | 4 | 1273.26 | --   |
|                                | A2G2BF1 | 1083.01 | Q | 4 | 1321.95 | 1.16 |
|                                | A2      | 914.67  | D | 4 | 1151.55 | --   |
|                                | A2F     | 951.2   | Q | 4 | 1151.55 | --   |
| TPLTANITK                      | A2G2    | 861.53  | Q | 3 | 1108.51 | --   |
|                                | A2G2F1  | 910.23  | Q | 3 | 1181.54 | 1.27 |
|                                | A2G1    | 807.51  | Q | 3 | 1291.07 | --   |
|                                | A2G1F1  | 856.21  | Q | 3 | 1364.1  | 1.33 |
|                                | AB1G1   | 875.21  | Q | 3 | 1129.02 | --   |
|                                | AB1G1F1 | 923.91  | Q | 3 | 1202.05 | --   |
|                                | A2G2B   | 929.23  | Q | 3 | 1210.05 | --   |
|                                | A2G2BF1 | 977.93  | Q | 3 | 1283.08 | 1.2  |
| <b>ALPHA1-ACID GYCOPROTEIN</b> |         |         |   |   |         |      |
| QDQCIYNTTYLNVQR                | A2G2    | 885.36  | D | 4 | 1058.45 | --   |
|                                | A3G3    | 976.64  | Q | 4 | 1180.16 | --   |
|                                | A3G3F1  | 1013.16 | Q | 4 | 1228.85 | 1.53 |
|                                | A3G3F2  | 1049.69 | D | 4 | 1228.85 | --   |
|                                | AG44    | 1104.45 | Q | 4 | 1301.87 | --   |
|                                | A4G4F1  | 1140.97 | D | 4 | 1350.56 | --   |
|                                | A4G4F2  | 1177.48 | D | 4 | 1399.25 |      |
|                                | A4G4F3  | 1214    | D | 4 | 1447.93 |      |
| SVQEIQATFFYFTPDK               | A3G3    | 977.67  | Q | 4 | 1181.52 | --   |
|                                | AG44    | 1068.96 | Q | 4 | 1303.23 | --   |
|                                | A4G4F1  | 1105.47 | Q | 4 | 1351.91 | 2.28 |
|                                | A4G4F2  | 1141.98 | D | 4 | 1351.91 | --   |

|                       |         |           |   |   |          |      |
|-----------------------|---------|-----------|---|---|----------|------|
| <b>IgM</b>            |         |           |   |   |          |      |
| GLTFQQNASSMCVPDQDTAIR | A2G1F   | 987.17    | Q | 4 | 1194.18  | --   |
|                       | A2G2F   | 1027.68   | Q | 4 | 1248.2   | --   |
|                       | A2G1BF  | 1037.94   | D | 4 | 1261.87  | --   |
|                       | A2G2B1F | 1078.45   | Q | 4 | 1315.89  | --   |
| <b>NNSDISSTR</b>      | A2      | 764.63    | D | 3 | 1044.93  | --   |
|                       | A2F     | 813.33    | D | 3 | 1117.96  | --   |
|                       | A2G1    | 818.66    | Q | 3 | 1044.93  | --   |
|                       | A2G1F   | 867.36    | Q | 3 | 1117.96  | 1.98 |
|                       | A2G2    | 872.69    | Q | 3 | 1125.96  | --   |
|                       | A2G2F   | 921.39    | Q | 3 | 1198.99  | 1.01 |
|                       | A2G1B   | 886.36    | D | 3 | 1146.47  | --   |
|                       | A2G1BF  | 935.06    | Q | 3 | 1219.5   | --   |
|                       | A2G2B   | 940.39    | D | 3 | 1227.5   | --   |
|                       | A2G2B1F | 989.09    | Q | 3 | 1300.53  | --   |
|                       | A3G3    | 994.39    | Q | 3 | 1308.52  | --   |
|                       | A3G3F   | 1043.0877 | Q | 3 | 1381.55  | 1.11 |
| <b>COMPLEMENT C3</b>  |         |           |   |   |          |      |
| TVLTPATNHMGNVFTTIPANR | M5      | 1157.87   | Q | 3 | 1229.62  | --   |
|                       | M6      | 1211.88   | Q | 3 | 1229.62  | --   |
| <b>IgG1</b>           |         |           |   |   |          |      |
| EEQYNSTYR             | A2      | 830.001   | Q | 3 | 1142.958 | --   |
|                       | A1F     | 865.0113  | Q | 3 | 1114.447 | --   |
|                       | A2F     | 878.687   | Q | 3 | 1215.987 | 1.06 |
|                       | A2G1    | 884.018   | Q | 3 | 1142.958 | --   |
|                       | A2B     | 897.694   | Q | 3 | 1244.497 | --   |
|                       | A2G1F   | 932.704   | Q | 3 | 1215.987 | 1    |
|                       | A2G2    | 938.036   | Q | 3 | 1223.984 | --   |
|                       | A2FB    | 946.38    | Q | 3 | 1317.526 | --   |
|                       | A2G1B   | 951.712   | Q | 3 | 1244.497 | --   |



|                 |         |          |   |   |          |      |
|-----------------|---------|----------|---|---|----------|------|
|                 | A2G2F   | 986.722  | Q | 3 | 1297.013 | 1.01 |
|                 | A2G1FB  | 1000.398 | Q | 3 | 1317.526 | --   |
|                 | A2G2B   | 1005.729 | Q | 3 | 1325.524 | --   |
|                 | A2G2BF1 | 1054.415 | Q | 3 | 1398.553 | 1    |
| <b>IgG2/3</b>   |         |          |   |   |          |      |
| EEQFNSTFR       | A1F     | 800.331  | Q | 3 | 1098.452 | --   |
|                 | A2      | 819.338  | Q | 3 | 1126.963 | --   |
|                 | A1G1F   | 854.348  | Q | 3 | 1098.452 | --   |
|                 | A2F     | 868.024  | Q | 3 | 1199.992 | 1.01 |
|                 | A2G1    | 873.355  | Q | 3 | 1126.963 | --   |
|                 | A2B     | 887.031  | Q | 3 | 1228.503 | --   |
|                 | A2G1F   | 922.041  | Q | 3 | 1199.992 | 1    |
|                 | A2G2    | 927.373  | Q | 3 | 1207.989 | --   |
|                 | A2BF    | 935.717  | Q | 3 | 1301.532 | --   |
|                 | A2G2F   | 976.059  | Q | 3 | 1281.018 | 0.98 |
|                 | A2G1B   | 989.734  | Q | 3 | 1301.532 | --   |
|                 | A2G1BF  | 1043.752 | Q | 3 | 1382.558 | --   |
| <b>IgG4</b>     |         |          |   |   |          |      |
| EEQF(Y)NSTY(F)R | A2      | 824.669  | Q | 3 | 1134.96  | --   |
|                 | A1G1F   | 859.68   | D | 3 | 1106.45  | --   |
|                 | A2F     | 873.355  | Q | 3 | 1207.989 | 1.04 |
|                 | A2G1    | 878.687  | Q | 3 | 1134.96  | --   |
|                 | A2B     | 892.362  | D | 3 | 1236.5   | --   |
|                 | A2G1F   | 927.373  | Q | 3 | 1207.989 | 0.8  |
|                 | A2G2    | 932.704  | Q | 3 | 1215.987 | --   |
|                 | A2FB1   | 941.048  | Q | 3 | 1309.529 | --   |
|                 | A2G2F   | 981.39   | Q | 3 | 1289.016 | 0.91 |
|                 | A2G1BF  | 995.066  | Q | 3 | 1309.529 | --   |
|                 | A2G2B   | 1000.398 | Q | 3 | 1317.526 | --   |
|                 | A2G2BF1 | 1049.084 | D | 3 | 1390.555 | --   |
